# Supplementary material
Source: publisher figshare collection journal article supplement (https://gsajournals.figshare.com/ndownloader/files/28920378)
Supplement: Supplementary file 1 [file 28920378]

**Table S1. Yeast strains**

| **Strain** | **Genotype** |
| --- | --- |
| KA255 | *MAT* *his3∆200 ura3-52 trp1∆63 kanMX-GAL1pr-FLO8-HIS3 hht2-hhf2::synH3-URA3 hht1-hhf1∆::natmx4* |
| KA256 | *MAT***a** *his3∆200 ura3-52 trp1∆63 kanMX-GAL1pr-FLO8-HIS3 hda3∆::TRP1 hht2-hhf2::synH3-URA3 hht1-hhf1∆::natmx4* |
| KA257 | *MAT***a** *his3∆200 ura3-52 trp1∆63 kanMX-GAL1pr-flo8-HIS3 3HA-rtf1-102-104A hht2-hhf2::synH3-URA3 hht1-hhf1∆::natmx4* |
| KA258 | *MAT* *his3∆200 ura3-52 trp1∆63 kanMX-GAL1pr-flo8-HIS3 3HA-rtf1-102-104A hda3∆::TRP1 hht2-hhf2::synH3-URA3 hht1-hhf1∆::natmx4* |
| KA295 | *MAT***a** *his3∆200 leu2∆1 ura3(∆0 or-52) trp1∆63 kanMX-GAL1pr-FLO8-HIS3 hht2-hhf2::synH3-K14A-URA3 hht1-hhf1∆::natmx4* |
| KA296 | *MAT* *his3∆200 leu2∆1 ura3(∆0 or-52) trp1∆63 kanMX-GAL1pr-FLO8-HIS3 hda3∆::TRP1 hht2-hhf2::synH3-K14A-URA3 hht1-hhf1∆::natmx4* |
| KA297 | *MAT***a** *his3∆200 leu2∆1 ura3(∆0 or-52) trp1∆63 kanMX-GAL1pr-FLO8-HIS3 3HA-rtf1-102-104A hht2-hhf2::synH3-K14A-URA3 hht1-hhf1∆::natmx4* |
| KA298 | *MAT* *his3∆200 leu2∆1 ura3(∆0 or-52) trp1∆63 kanMX-GAL1pr-FLO8-HIS3 3HA-rtf1-102-104A hda3∆::TRP1 hht2-hhf2::synH3-K14A-URA3 hht1-hhf1∆::natmx4* |
| KY433 | *MAT***a** *leu2∆1 ura3-52* |
| KY957 | *MAT***a** *his3∆200 leu2∆1 ura3-52 trp1∆63 rtf1∆101::LEU2* |
| KY1228 | *MAT***a** *his3∆200 lys2-128δ leu2∆1 ura3-52 trp1∆63 kanMX-GAL1pr-FLO8-HIS3 TELVR::URA3* |
| KY1232 | *MAT***a** *his3∆200 lys2-128δ leu2∆1 ura3-52 arg4-12 kanMX-GAL1pr-FLO8-HIS3 TELVR::URA3 3HA-rtf1-102-104A* |
| KY1370 | *MAT* *his3∆200 ura3-52 trp1∆63 arg4-12 kanMX-GAL1pr-FLO8-HIS3 TELVR::URA3 rtf1∆::ARG4* |
| KY1410 | *MAT* *his3∆200 lys2-128δ leu2∆1 ura3-52 kanMX-GAL1pr-FLO8-HIS3 TELVR::URA3 3HA-rtf1-108-110A sup2-22* |
| KY1411 | *MAT* *his3∆200 lys2-128δ leu2∆1 ura3-52 kanMX-GAL1pr-FLO8-HIS3 TELVR::URA3 3HA-rtf1-108-110A sup2-23* |
| KY1490 | *MAT***a** *his3∆200 lys2-128δ leu2∆1 ura3-52 trp1∆63 kanMX-GAL1pr-FLO8-HIS3 TELVR::URA3 3HA-rtf1-108-110A* |
| KY1491 | *MAT* *his3∆200 lys2-128δ leu2∆1 ura3-52 kanMX-GAL1pr-FLO8-HIS3 TELVR::URA3* |
| KY1494 | *MAT* *his3∆200 lys2-128δ leu2∆1 ura3-52 trp1∆63 kanMX-GAL1pr-FLO8-HIS3 TELVR::URA3 3HA-rtf1-108-110A* |
| KY1496 | *MAT***a** *his3∆200 lys2-128δ leu2∆1 ura3-52 kanMX-GAL1pr-FLO8-HIS3 TELVR::URA3 sup2-22* |
| KY1498 | *MAT* *his3∆200 lys2-128δ leu2∆1 ura3-52 trp1∆63 kanMX-GAL1pr-FLO8-HIS3 TELVR::URA3 sup2-22* |
| KY1502 | *MAT***a** *his3∆200 lys2-128δ leu2∆1 ura3-52 trp1∆63 kanMX-GAL1pr-FLO8-HIS3 TELVR::URA3 3HA-rtf1-108-110A sup2-22* |
| KY1519 | *MAT***a** *his3∆200 lys2-128δ leu2∆1 ura3-52 trp1∆63 kanMX-GAL1pr-FLO8-HIS3 TELVR::URA3 3HA-rtf1-102-104A sup2-22* |
| KY1520 | *MAT* *his3∆200 leu2∆1 ura3-52 kanMX-GAL1pr-FLO8-HIS3 TELVR::URA3 rtf1∆::ARG4 sup2-22* |
| KY1523 | *MAT***a** *his3∆200 lys2-128δ ura3-52 trp1∆63 arg4-12 kanMX-GAL1pr-FLO8-HIS3 TELVR::URA3* |
| KY1526 | *MAT* *his3∆200 lys2-128δ leu2∆1 ura3-52 kanMX-GAL1pr-FLO8-HIS3 TELVR::URA3 3HA-rtf1-E104K* |
| KY1532 | *MAT***a** *his4-912δ lys2-128δ leu2∆1 trp1∆63 3HA-rtf1-E104K* |
| KY1715 | *MAT***a** *set1∆::kanMX* |
| KY1717 | *MAT***a** *dot1∆::kanMX* |
| KY2792 | *MAT* *his3∆200 lys2-128δ leu2∆1 ura3-52 trp1∆63 kanMX-GAL1pr-FLO8-HIS3 TELVR::URA3 3HA-rtf1-102-104A* |
| KY2832 | *MAT***a** *his3∆200 lys2-128δ leu2∆1 ura3-52 trp1∆63 kanMX-GAL1pr-FLO8-HIS3 rad6∆::URA3* |
| KY2855 | *MAT* *his3∆200 lys2-128δ ura3-52 arg4-12 kanMX-GAL1pr-FLO8-HIS3 TELVR::URA3 3HA-rtf1-E104K sup2-22* |
| KY2861 | *MAT* *leu2∆1 ura3-52 trp1∆63 hda3∆::TRP1* |
| KY2867 | *MAT***a** *his3∆200 lys2-128δ ura3-52 trp1∆63 kanMX-GAL1pr-FLO8-HIS3 TELVR::URA3 3HA-rtf1-E104K hda3∆::TRP1* |
| KY2868 | *MAT* *his3∆200 leu2∆1 ura3-52 trp1∆63 arg4-12 kanMX-GAL1pr-FLO8-HIS3 TELVR::URA3 hda3∆::TRP1* |
| KY2876 | *MAT* *his3∆200 leu2∆1 ura3(∆0 or -52) trp1∆63 kanMX-GAL1pr-FLO8-HIS3 TELVR::URA3 (hta2-ht2b∆)::TRP1 HTA1-htb1K123R* |
| KY2878 | *MAT* *his3∆200 leu2∆1 ura3(∆0 or -52) trp1∆63 kanMX-GAL1pr-FLO8-HIS3 TELVR::URA3 (hta2-ht2b∆)::TRP1* |
| KY2898 | *MAT* *his3∆200 lys2-128δ leu2∆1 ura3-52 trp1∆63 kanMX-GAL1pr-FLO8-HIS3 TELVR::URA3 3HA-rtf1-102-104A hda3∆::TRP1* |
| KY2902 | *MAT* *his3∆200 lys2-128δ leu2∆1 ura3-52 trp1∆63 kanMX-GAL1pr-FLO8-HIS3 TELVR::URA3 3HA-rtf1-108-110A hda3∆::TRP1* |
| KY2910 | *MAT* *his3∆200 leu2∆1 ura3(∆0 or -52) trp1∆63 kanMX-GAL1pr-FLO8-HIS3 TELVR::URA3 (hta2-ht2b∆)::TRP1 hda3∆::TRP1 HTA1-htb1K123R* |
| KY2918 | *MAT***a** *his3∆200 leu2∆1 ura3-52 trp1∆63 kanMX-GAL1pr-FLO8-HIS3 TELVR::URA3 hda3∆::TRP1 rad6∆::URA3* |
| KY2921 | *MAT* *his3∆200 lys2-128δ ura3(∆0 or -52) trp1∆63 kanMX-GAL1pr-FLO8-HIS3 TELVR::URA3 (hta2-ht2b∆)::TRP1 hda3∆::TRP1* |
| KY2924 | *MAT* *his3∆200 leu2∆1 ura3(∆0 or -52) trp1∆63 kanMX-GAL1pr-FLO8-HIS3 TELVR::URA3 hda3∆::TRP1 HTA1-htb1K123R* |
| KY2929 | *MAT* *his3∆200 leu2∆1 ura3(∆0 or -52) trp1∆63 arg4-12 kanMX-GAL1pr-FLO8-HIS3 TELVR::URA3 HTA1-htb1K123R* |
| KY2934 | *MAT***a** *his3∆200 lys2-128δ ura3-52 trp1∆63 arg4-12 kanMX-GAL1pr-FLO8-HIS3 TELVR::URA3 hda2∆::TRP1* |
| KY2943 | *MAT***a** *his3∆200 leu2∆1 ura3-52 trp1∆63 arg4-12 kanMX-GAL1pr-FLO8-HIS3 TELVR::URA3 rtf1∆::ARG4 hda3∆::TRP1* |
| KY2957 | *MAT* *his3∆200 lys2-128δ leu2∆1 ura3-52 trp1∆63 kanMX-GAL1pr-FLO8-HIS3 TELVR::URA3 3HA-rtf1-102-104A hda1∆::TRP1* |
| KY2963 | *MAT***a** *his3∆200 lys2-128δ ura3-52 trp1∆63 kanMX-GAL1pr-FLO8-HIS3 TELVR::URA3 hda1∆::TRP1* |
| KY2965 | *MAT* *his3∆200 lys2-128δ leu2∆1 ura3-52 trp1∆63 arg4-12 kanMX-GAL1pr-FLO8-HIS3 TELVR::URA3 3HA-rtf1-102-104A hda2∆::TRP1* |
| KY2973 | *MAT* *his3∆200 lys2-128δ leu2∆1 ura3-52 trp1∆63 kanMX-GAL1pr-FLO8-HIS3 TELVR::URA3 3HA-rtf1-108-110A hda1∆::TRP1* |
| KY2974 | *MAT* *his3∆200 lys2-128δ leu2∆1 ura3-52 trp1∆63 arg4-12 kanMX-GAL1pr-FLO8-HIS3 TELVR::URA3 3HA-rtf1-108-110A hda2∆::TRP1* |
| KY2981 | *MAT***a** *his3∆200 lys2-128δ leu2∆1 ura3-52 trp1∆63 arg4-12 kanMX-GAL1pr-FLO8-HIS3 TELVR::URA3 rtf1∆::ARG4 hda1∆::TRP1* |
| KY2983 | *MAT***a** *his3∆200 lys2-128δ leu2∆1 ura3-52 trp1∆63 arg4-12 kanMX-GAL1pr-FLO8-HIS3 TELVR::URA3 rtf1∆::ARG4 hda2∆::TRP1* |
| KY2987 | *MAT***a** *his3∆200 lys2-128δ ura3-52 trp1∆63 arg4-12 kanMX-GAL1pr-FLO8-HIS3 TELVR::URA3 rtf1∆::ARG4* |
| KY2999 | *MAT***a** *his3∆200 lys2-128δ ura3-52 trp1∆63 kanMX-GAL1pr-FLO8-HIS3 TELVR::URA3 3HA-rtf1-E104K hda1∆::TRP1* |
| KY3001 | *MAT***a** *his3∆200 lys2-128δ ura3-52 trp1∆63 kanMX-GAL1pr-FLO8-HIS3 TELVR::URA3 3HA-rtf1-E104K hda2∆::TRP1* |
| KY3002 | *MAT***a** *his3∆200 lys2-128δ leu2∆1 ura3-52 trp1∆63 arg4-12 kanMX-GAL1pr-FLO8-HIS3 TELVR::URA3 3HA-rtf1-E104K* |
| KY3011 | *MAT* *his3∆200 leu2∆1 ura3-52 trp1∆63 gcn5∆::HIS3 hda3∆::TRP1* |
| KY3014 | *MAT* *his3∆200 leu2∆1 ura3-52 trp1∆63 gcn5∆::HIS3* |
| KY3032 | *MAT***a** *his4-912δ lys2-128δ leu2∆1 trp1∆63 rtf1∆::LEU2 hda3∆::TRP1* |
| KY3034 | *MAT***a** *his4-912δ lys2-128δ leu2∆1 trp1∆63 rtf1∆::LEU2* |
| KY3038 | *MAT***a** *his3∆200 lys2-128δ leu2∆1 ura3-52 arg4-12 kanMX-GAL1pr-FLO8-HIS3 TELVR::URA3 3HA-rtf1-102-104A set3∆::natMX* |
| KY3042 | *MAT***a** *his3∆200 lys2-128δ leu2∆1 ura3-52 arg4-12 kanMX-GAL1pr-FLO8-HIS3 TELVR::URA3 set3∆::natMX* |
| KY3053 | *MAT***a** *his3∆200 lys2-128δ ura3-52 trp1∆63 kanMX-GAL1pr-FLO8-HIS3 TELVR::URA3 3HA-rtf1-102-104A rco1Δ::TRP1* |
| KY3057 | *MAT***a** *his3∆200 lys2-128δ leu2∆1 ura3-52 trp1∆63 kanMX-GAL1pr-FLO8-HIS3 TELVR::URA3 rco1Δ::TRP1* |
| KY3063 | *MAT* *his3∆200 lys2-128δ leu2∆1 ura3-52 kanMX-GAL1pr-FLO8-HIS3 TELVR::URA3 3HA-rtf1-102-104A rpd3Δ::LEU2* |
| KY3070 | *MAT* *his3∆200 lys2-128δ leu2∆1 ura3-52 kanMX-GAL1pr-FLO8-HIS3 TELVR::URA3 rpd3Δ::LEU2* |
| KY3073 | *MAT* *his3∆200 ura3(∆0 or -52) trp1∆63 kanMX-GAL1pr-FLO8-HIS3 TELVR::URA3 spt16-197* |
| KY3082 | *MAT* *his3∆200 leu2∆1 ura3-52 trp1∆63 kanMX-GAL1pr-FLO8-HIS3 TELVR::URA3 hda3∆::TRP1 FLAG-spt6-1004* |
| KY3084 | *MAT* *his3∆200 leu2∆1 ura3-52 trp1∆63 arg4-12 kanMX-GAL1pr-FLO8-HIS3 TELVR::URA3 FLAG-spt6-1004* |
| KY3093 | *MAT***a** *his3∆200 leu2∆1 ura3(∆0 or -52) trp1∆63 kanMX-GAL1pr-FLO8-HIS3 TELVR::URA3 hda3∆::TRP1 spt16-197* |
| KY3106 | *MAT***a** *his3∆200 ura3-52 arg4-12 kanMX-GAL1pr-FLO8-HIS3 TELVR::URA3 3HA-rtf1-102-104A hda3∆::TRP1 gcn5∆::natMX* |
| KY3114 | *MAT***a** *his3∆200 ura3-52 kanMX-GAL1pr-FLO8-HIS3 TELVR::URA3 3HA-rtf1-102-104A gcn5∆::natMX* |
| KY3115 | *MAT***a** *his3∆200 leu2∆1 ura3-52 trp1∆63 arg4-12 kanMX-GAL1pr-FLO8-HIS3 TELVR::URA3 hda3∆::TRP1 gcn5∆::natMX* |
| KY3117 | *MAT* *his3∆200 ura3-52 arg4-12 kanMX-GAL1pr-FLO8-HIS3 TELVR::URA3 gcn5∆::natMX* |
| KY3178 | *MAT***a** *his4-912δ lys2-128δ leu2∆1 trp1∆63 3HA-rtf1-E104K hda3∆::TRP1* |
| KY3186 | *MAT* *his4-912δ lys2-128δ trp1∆63 hda3∆::TRP1* |
| KY3191 | *MAT* *his4-912δ lys2-128δ trp1∆63* |
| KY3198 | *MAT* *his3∆200 leu2∆1 ura3-52 trp1∆63 kanMX-GAL1pr-FLO8-HIS3 TELVR::URA3 chd1∆::LEU2* |
| KY3199 | *MAT* *his3∆200 leu2∆1 ura3-52 trp1∆63 kanMX-GAL1pr-FLO8-HIS3 TELVR::URA3 hda3∆::TRP1 chd1∆::LEU2* |
| KY3200 | *MAT***a** *his3∆200 ura3-52 trp1∆63 kanMX-GAL1pr-FLO8-HIS3 TELVR::URA3 set2∆:: kanMX* |
| KY3201 | *MAT***a** *his3∆200 ura3-52 trp1∆63 kanMX-GAL1pr-FLO8-HIS3 TELVR::URA3 hda3∆::TRP1 set2∆::kanMX* |
| KY3362 | *MAT* *his3∆200 ura3-52 trp1∆63 kanMX-GAL1pr-FLO8-HIS3 sas2∆::kanMX* |
| KY3364 | *MAT* *his3∆200 ura3-52 arg4-12 kanMX-GAL1pr-FLO8-HIS3 sas3∆::kanMX* |
| KY3366 | *MAT* *his3∆200 lys2-128δ ura3-52 trp1∆63 kanMX-GAL1pr-FLO8-HIS3 3HA-rtf1-102-104A sas2∆::kanMX* |
| KY3369 | *MAT***a** *his3∆200 leu2∆1 ura3-52 trp1∆63 kanMX-GAL1pr-FLO8-HIS3 3HA-rtf1-108-110A sas2∆::kanMX* |
| KY3371 | *MAT***a** *his3∆200 ura3-52 kanMX-GAL1pr-FLO8-HIS3 3HA-rtf1-102-104A sas3∆::KanMX* |
| KY3372 | *MAT* *his3∆200 leu2∆1 ura3-52 trp1∆63 kanMX-GAL1pr-FLO8-HIS3 TELVR::URA3 3HA-rtf1-108-110A sas3∆::kanMX* |
| KY3380 | *MAT***a** *his3∆200 leu2∆1 ura3-52 trp1∆63 3HA-rtf1-108-110A* |
| KY3423 | *MAT* *his3∆200 leu2∆1 ura3-52 trp1∆63 kanMX-GAL1pr-FLO8-HIS3 TELVR::URA3* |
| KY3425 | *MAT***a** *his3∆200 leu2∆1 ura3-52 trp1∆63 kanMX-GAL1pr-FLO8-HIS3 TELVR::URA3 3HA-rtf1-108-110A* |
| KY3427 | *MAT***a** *his3∆200 ura3-52 trp1∆63 kanMX-GAL1pr-FLO8-HIS3 TELVR::URA3 hda3∆::TRP1* |
| KY3429 | *MAT* *his3∆200 leu2∆1 ura3-52 trp1∆63 arg4-12 kanMX-GAL1pr-FLO8-HIS3 TELVR::URA3 3HA-rtf1-108-110A hda3∆::TRP1* |
| KY3431 | *MAT* *his3∆200 leu2∆1 ura3-52 trp1∆63 arg4-12 kanMX-GAL1pr-FLO8-HIS3 TELVR::URA3 sas3∆::kanMX* |
| KY3434 | *MAT* *his3∆200 leu2∆1 ura3-52 trp1∆63 arg4-12 kanMX-GAL1pr-FLO8-HIS3 TELVR::URA3 3HA-rtf1-108-110A sas3∆::kanMX* |
| KY3438 | *MAT* *his3∆200 leu2∆1 ura3-52 trp1∆63 kanMX-GAL1pr-FLO8-HIS3 TELVR::URA3 hda3∆::TRP1 sas3∆::kanMX* |
| KY3441 | *MAT***a** *his3∆200 leu2∆1 ura3-52 trp1∆63 kanMX-GAL1pr-FLO8-HIS3 TELVR::URA3 3HA-rtf1-108-110A hda3∆::TRP1 sas3∆::kanMX* |
| KY3910 | *MAT* *his3∆200 leu2∆1 ura3-52 trp1∆63 arg4-12 kanMX-GAL1pr-FLO8-HIS3 TELVR::URA3 hda1-H206A* |
| KY3911 | *MAT***a** *his3∆200 leu2∆1 ura3-52 trp1∆63 kanMX-GAL1pr-FLO8-HIS3 TELVR::URA3 3HA-rtf1-108-110A hda1-H206A* |
